# Supplementary material
Source: PubMed Central journal article supplement (PMC7344339)
Supplement: NIHMS1605408-supplement-1.pdf [file NIHMS1605408-supplement-1.pdf]

**Cell Reports, Volume 31**

**Supplemental Information**

**Relocation of Collapsed Forks to the Nuclear Pore  
Complex Depends on Sumoylation of DNA Repair  
Proteins and Permits Rad51 Association**

**Jenna M. Whalen, Nalini Dhingra, Lei Wei, Xiaolan Zhao, and Catherine H. Freudenreich**

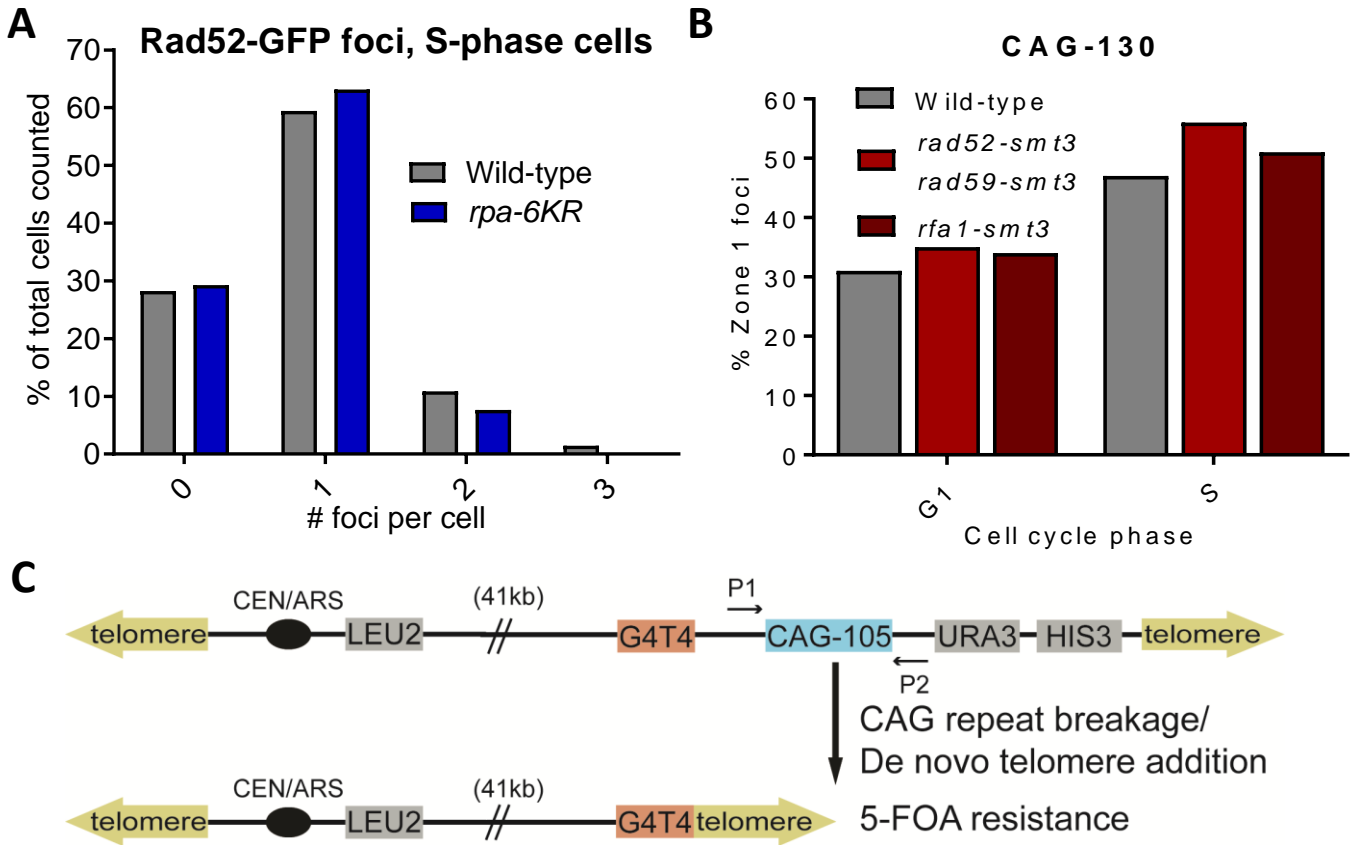

**Figure S1 Related to Figures 1 and 2:** A) Percentage of S-phase cells with the indicated number of MMS induced Rad52-GFP foci in wild-type and *rpa-6KR* strains. 138 cells were analyzed for wild-type and 236 cells were analyzed for *rpa-6KR*; raw values in Table S3. B) Percent of Zone 1 foci for CAG-130 G<sup>1</sup>- and S-phase cells in wild-type, and *rad52-sm t3*, *rad59-sm t3*, and *rfa1-sm t3* strains. Smt3 is at the C-terminus of each. The number of cells analyzed per strain ranges from 150-283. See Table S1 for the exact number of cells analyzed, percentages, and P-values. See Table S1 and Figure S7B for zoning data for individual strains. C) Schematic of the CAG fragility assay. P1 and P2 arrows indicate primers used to confirm CAG tract length prior to each experiment. The G<sub>4</sub>T<sub>4</sub> sequence proximal to the CAG repeat facilitates recovery of end loss events by providing a seed for telomere addition by telomerase.

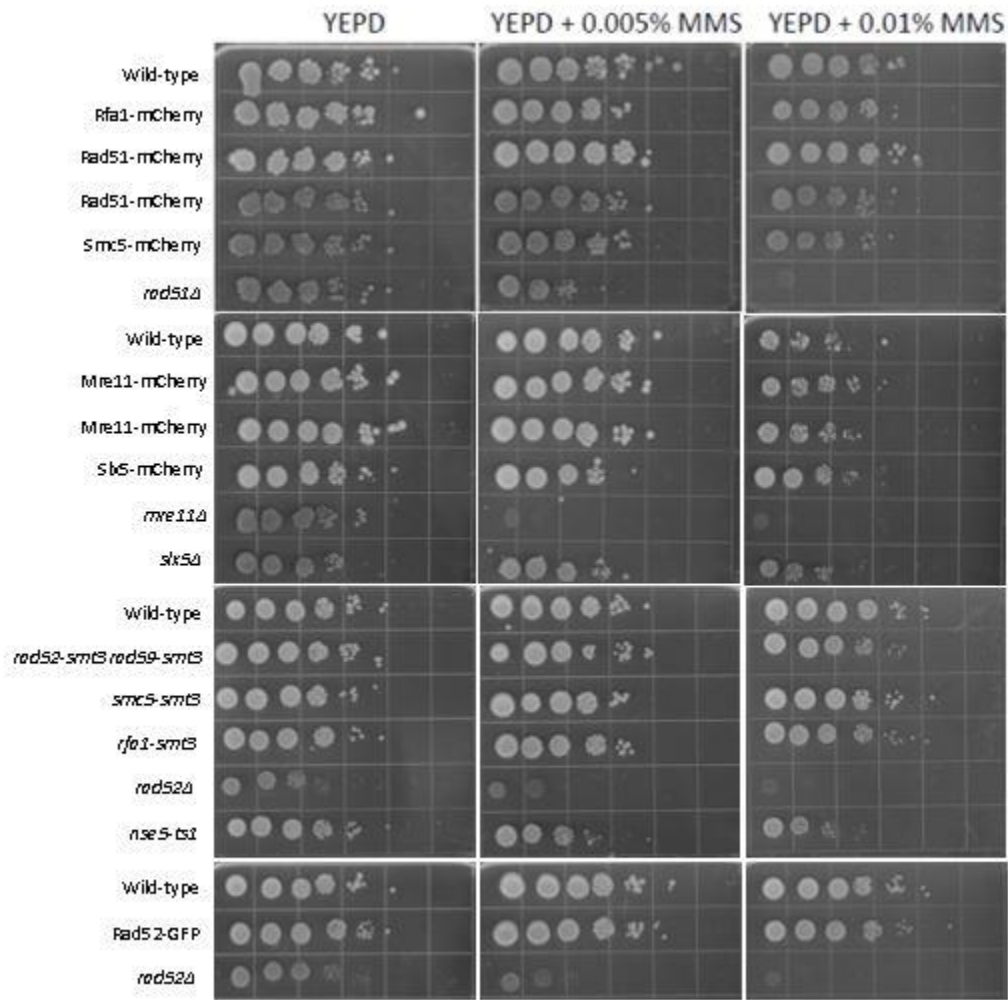

**Figure S2: MMS sensitivity spot assay for mutants. Related to Figures 2, 3, 5, and 6.**

Growth of mutants on YEPD media containing 0.005% and 0.01% methyl methanesulfonate (MMS) as compared to YEPD media without MMS. Cells were 10-fold serially diluted six times and grown at 30C for two days.

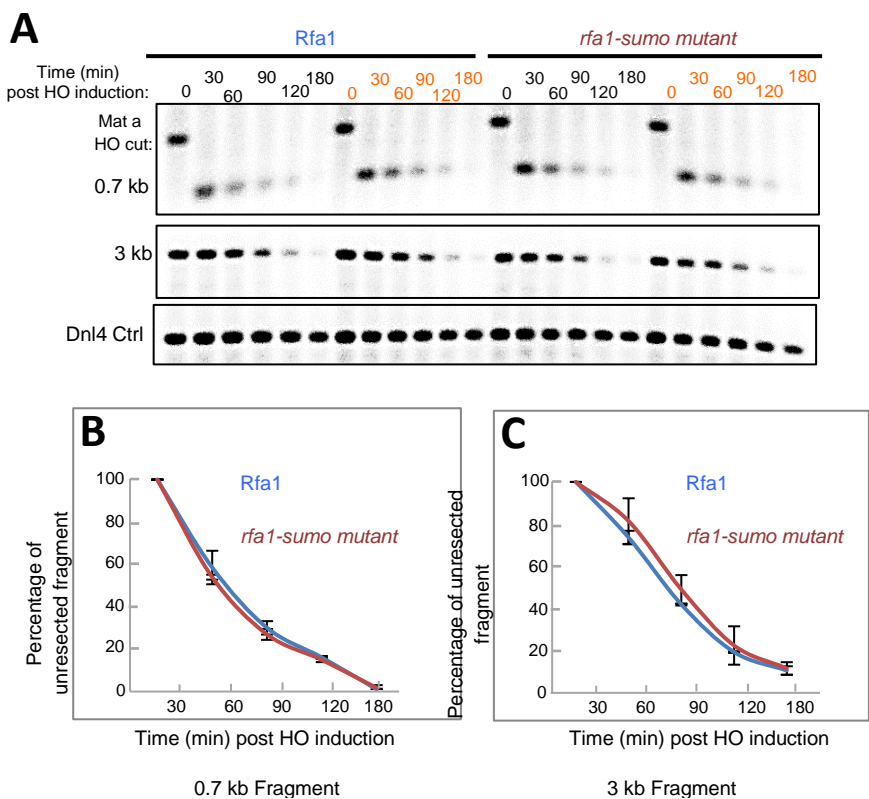

**Figure S3: Loss of RPA1 sumoylation does not reduce DSB resection efficiency. Related to Figure 2.** Southern blot (A) and quantification (B-C) showing the kinetics of the disappearance of two fragments with end points located 0.7 kb (top panel) or 3 kb (middle panel) away from the HO cut site for the wt (Rfa1) or *rfa1-4KR* strains. Dnl4 signal (bottom panel) indicates equal loading. Two independent isolates are shown for each genotype. Quantification shows the ratios of 0.7 kb (B) and 3 kb (C) fragment signals to the Dnl4 signal, with the ratio at 30 mins set to 100%.

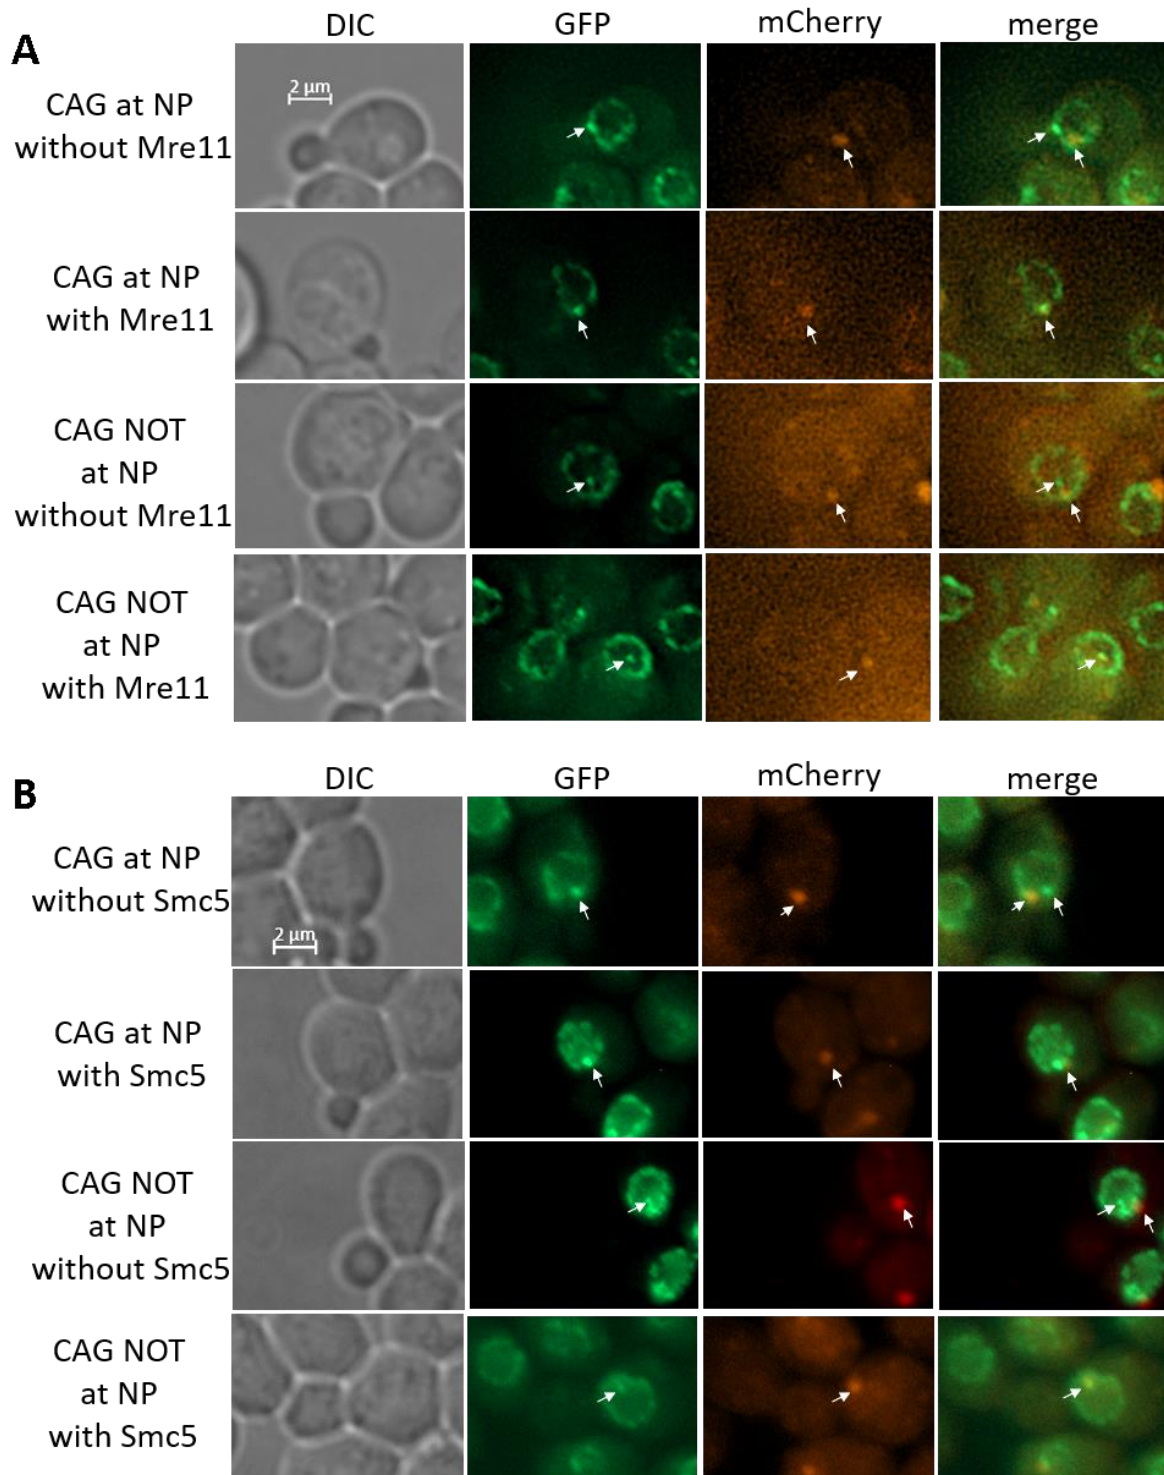

**Figure S4: Co-localization example images in S-phase cells. Related to Figure 5.** Example images of the CAG locus (GFP) and tagged protein foci (mCherry) co-localization for data in Figure 5. A) Mre11-mCherry B) Smc5-mCherry.

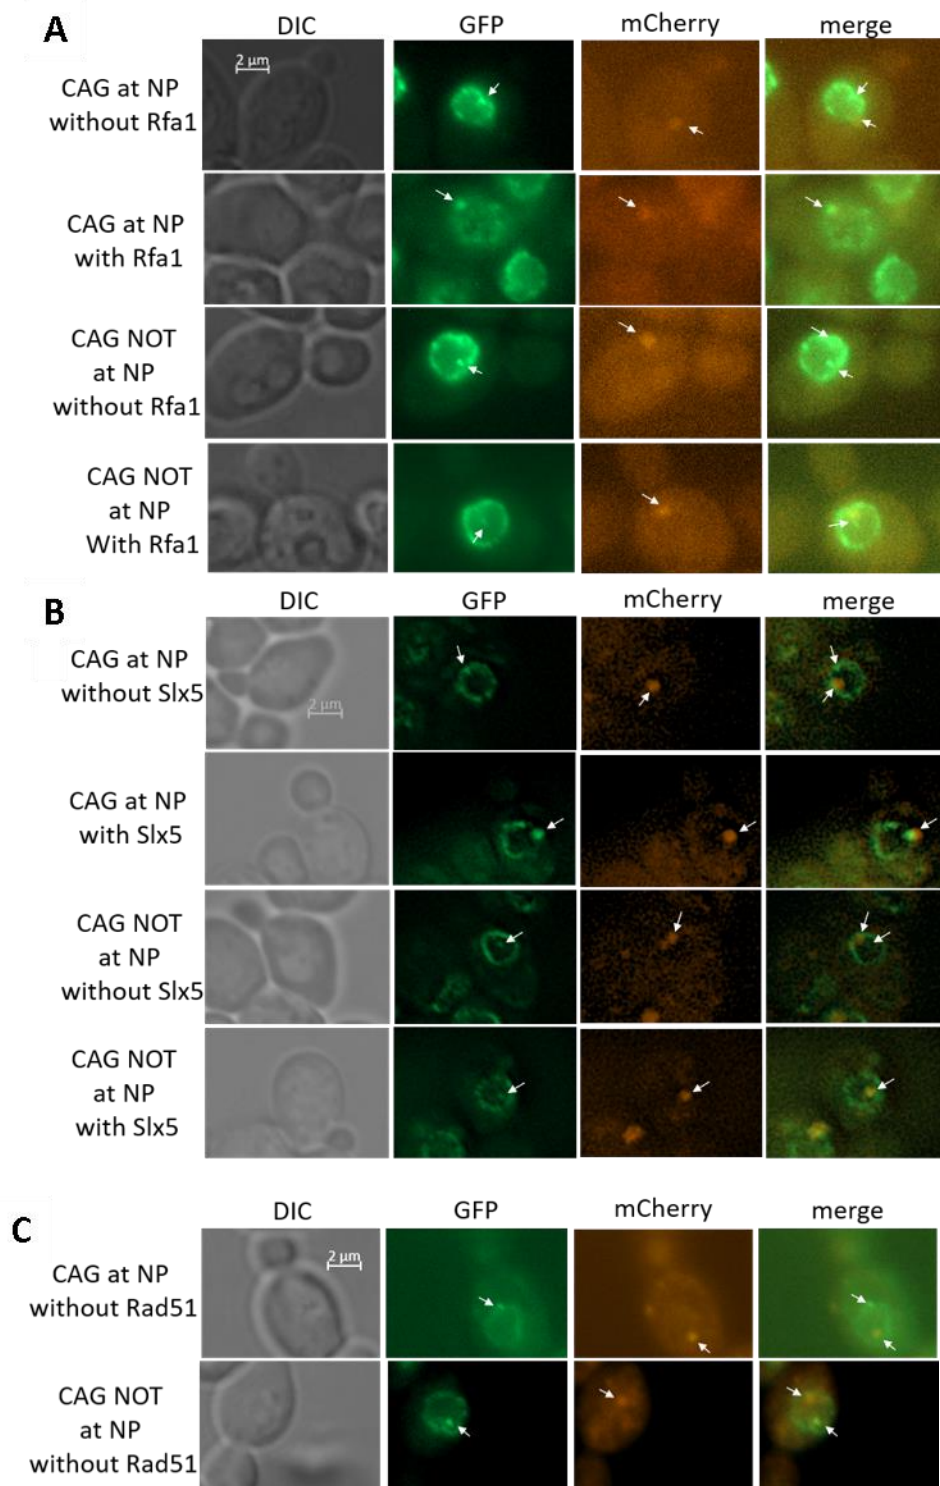

**Figure S5: Co-localization example images in S-phase cells. Related to Figures 5 and 6.** Example images of the CAG locus (GFP) and tagged protein foci (mCherry) co-localization for data in Figure 5 and 6. A) Rfa1-mCherry B) Slx5-mCherry and C) additional Rad51-mCherry examples.

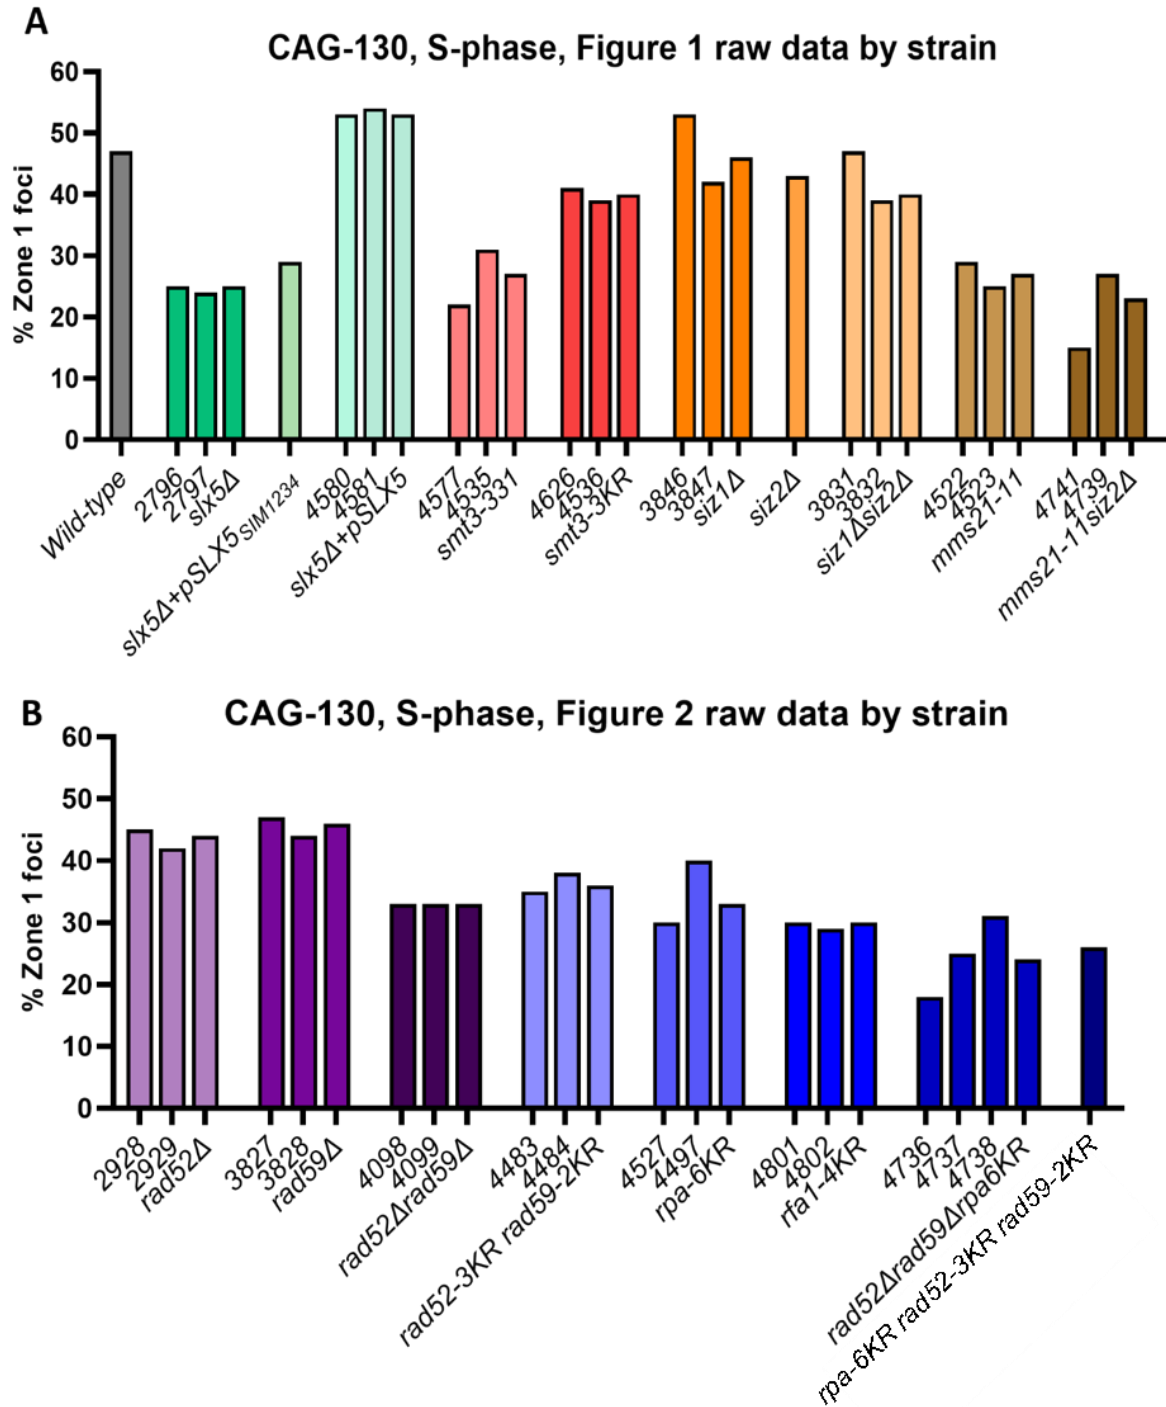

**Figure S6: Raw zoning assay data separated by strain. Related to Figures 1 and 2.** Percentage of zone 1 foci for individual strains from A) Figure 1 and B) Figure 2. Each mutant has a unique color and the data for individual strain numbers is shown followed by the combined data labeled with the mutant name. See Table S1 for the exact number of cells analyzed, percentages, and P-values.



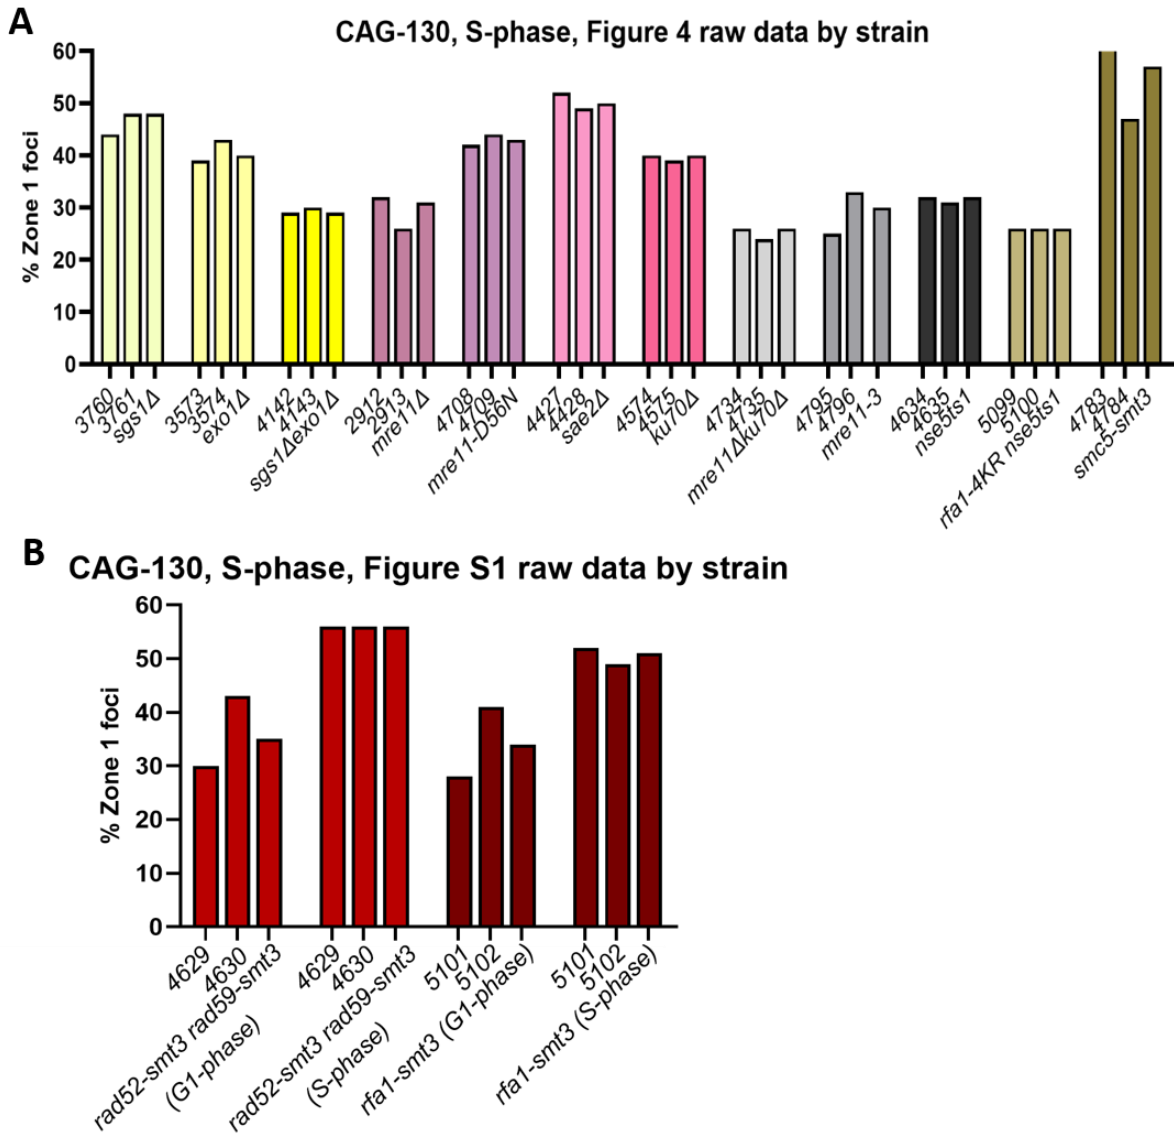

**Figure S7: Raw zoning assay data separated by strain. Related to Figures 4 and S1.** Percentage of zone 1 foci for individual strains from A) Figure 4 and B) Figure S1. Each mutant has a unique color and the data for individual strain numbers is shown followed by the combined data labeled with the mutant name. See Table S1 for the exact number of cells analyzed, percentages, and P-values.



**Supplementary Table 2: Fragility Analysis of CAG-105 repeats on the LEU2-URA3-HIS3 YAC. Related to Figure 1.**

|                 | Average Rate of FOA <sup>R</sup> (x10 <sup>-6</sup> ) ± SEM | Rate of FOA <sup>R</sup> (x10 <sup>-6</sup> ) for each assay | Fold over WT | No. of assays | % End loss | p-value to WT |
|-----------------|-------------------------------------------------------------|--------------------------------------------------------------|--------------|---------------|------------|---------------|
| Wild-type       | 10.1±0.52                                                   | 11.1                                                         | ---          | 5             | 96         | ---           |
|                 |                                                             | 10.2                                                         |              |               |            |               |
|                 |                                                             | 11.2                                                         |              |               |            |               |
|                 |                                                             | 9.6                                                          |              |               |            |               |
|                 |                                                             | 8.4                                                          |              |               |            |               |
| <i>slx5Δ</i>    | 24.53 ±1.99                                                 | 26.3                                                         | 2.4          | 4             | 92         | 0.0001        |
|                 |                                                             | 29.3                                                         |              |               |            |               |
|                 |                                                             | 20.9                                                         |              |               |            |               |
|                 |                                                             | 21.6                                                         |              |               |            |               |
| <i>smt3-331</i> | 38.1 ±8.53                                                  | 55.1                                                         | 3.8          | 5             | 98         | 0.0113        |
|                 |                                                             | 21.6                                                         |              |               |            |               |
|                 |                                                             | 60.4                                                         |              |               |            |               |
|                 |                                                             | 35                                                           |              |               |            |               |
|                 |                                                             | 18.4                                                         |              |               |            |               |
| <i>mms21-11</i> | 19.45 ±2.49                                                 | 16.4                                                         | 1.9          | 6             | 97         | 0.0087        |
|                 |                                                             | 29.8                                                         |              |               |            |               |
|                 |                                                             | 13.4                                                         |              |               |            |               |
|                 |                                                             | 23.3                                                         |              |               |            |               |
|                 |                                                             | 18.7                                                         |              |               |            |               |
|                 |                                                             | 15.1                                                         |              |               |            |               |

**Supplementary Table 3: Rad52-GFP foci analysis in wild-type and *rpa-6KR* strains. Related to Figure S1.**

| Strain         | No. of Rad52-GFP foci per cell |      |              |      |              |    |              |     | Total No. of cells |
|----------------|--------------------------------|------|--------------|------|--------------|----|--------------|-----|--------------------|
|                | 0                              |      | 1            |      | 2            |    | 3            |     |                    |
|                | No. of cells                   | %    | No. of cells | %    | No. of cells | %  | No. of cells | %   |                    |
| Wild-type      | 39                             | 28.2 | 82           | 59.4 | 15           | 11 | 2            | 1.4 | 138                |
| <i>rpa-6KR</i> | 69                             | 29   | 149          | 63   | 18           | 8  | 0            | 0   | 236                |

**Supplementary Table 4: Zoning Assay time course analysis of *rad52-smt3rad59-smt3* and *smc5-smt3*. Related to Figures 2 and 4.**

|                                       |    | Strain          |                                        |                  |                  |        |
|---------------------------------------|----|-----------------|----------------------------------------|------------------|------------------|--------|
|                                       |    | Wild-type       | <i>rad52-smt3</i><br><i>rad59-smt3</i> | <i>smc5-smt3</i> | <i>rfa1-smt3</i> |        |
| Time after α-factor release (minutes) | 20 | No. Zone 1 foci | 44                                     | 37               | 44               | 45     |
|                                       |    | %               | 21.8                                   | 24.7             | 27               | 29     |
|                                       |    | Total No. cells | 202                                    | 150              | 161              | 154    |
|                                       |    | p-value to WT*  | ---                                    | 0.5254           | 0.2672           | 0.1106 |
|                                       | 30 | No. Zone 1 foci | 57                                     | 57               | 43               | 53     |
|                                       |    | %               | 32                                     | 36.5             | 28.2             | 33     |

|  |           |                        |                        |        |        |        |        |
|--|-----------|------------------------|------------------------|--------|--------|--------|--------|
|  |           | <b>Total No. cells</b> | 179                    | 156    | 152    | 159    |        |
|  |           | <b>p-value to WT*</b>  | ---                    | 0.4186 | 0.5484 | 0.8164 |        |
|  | <b>40</b> |                        | <b>No. Zone 1 foci</b> | 47     | 88     | 72     | 58     |
|  |           |                        | <b>%</b>               | 26.9   | 38.2   | 38.3   | 38.4   |
|  |           |                        | <b>Total No. cells</b> | 175    | 230    | 188    | 151    |
|  |           |                        | <b>p-value to WT*</b>  | ---    | 0.02   | 0.025  | 0.0323 |
|  | <b>50</b> |                        | <b>No. Zone 1 foci</b> | 71     | 93     | 75     | 83     |
|  |           |                        | <b>%</b>               | 34     | 46.5   | 38.7   | 45     |
|  |           |                        | <b>Total No. cells</b> | 206    | 200    | 194    | 185    |
|  |           |                        | <b>p-value to WT*</b>  | ---    | 0.0153 | 0.4068 | 0.0386 |
|  | <b>60</b> |                        | <b>No. Zone 1 foci</b> | 89     | 75     | 77     | 69     |
|  |           |                        | <b>%</b>               | 48.9   | 46     | 42.8   | 46     |
|  |           |                        | <b>Total No. cells</b> | 182    | 163    | 180    | 151    |
|  |           |                        | <b>p-value to WT*</b>  | ---    | 0.6659 | 0.2481 | 0.5828 |

\*using the Fisher's exact test

**Supplementary Table 5: Co-localization of mCherry tagged proteins with the CAG repeat in S-phase cells. Related to Figure 5.**

| Tagged Protein | Total # of cells counted | A                                      | B                                   | C                                          | D                                       | E                                                  | F                                         | G                                            | H                                       | % (#) of CAG at NP with tagged protein (B/(G+B)) | I                                                | J                                           | % (#) of CAG NOT at NP with tagged protein (D/(I+D)) | K<br>% (#) of tagged protein at the NP ((B+E+F)/Total) |
|----------------|--------------------------|----------------------------------------|-------------------------------------|--------------------------------------------|-----------------------------------------|----------------------------------------------------|-------------------------------------------|----------------------------------------------|-----------------------------------------|--------------------------------------------------|--------------------------------------------------|---------------------------------------------|------------------------------------------------------|--------------------------------------------------------|
|                |                          | % (#) CAG at NP without tagged protein | % (#) CAG at NP with tagged protein | % (#) CAG NOT at NP without tagged protein | % (#) CAG NOT at NP with tagged protein | % (#) CAG and tagged protein at NP, but not co-loc | % (#) CAG NOT at NP, tagged protein at NP | % (#) CAG at NP without tagged protein (A+E) | % (#) CAG at NP with tagged protein (B) |                                                  | % (#) CAG NOT at NP without tagged protein (C+F) | % (#) CAG NOT at NP with tagged protein (D) |                                                      |                                                        |
| Mre11          | 75                       | 1.3 (1)                                | 20 (15)                             | 0 (0)                                      | 10.7 (8)                                | 48 (36)                                            | 20 (15)                                   | 49 (37)                                      | 20 (15)                                 | 29 (15)                                          | 20 (15)                                          | 11 (8)                                      | 35 (8)                                               | 88 (66)                                                |
| Smc5           | 95                       | 4 (4)                                  | 36 (34)                             | 6 (6)                                      | 14 (13)                                 | 22 (21)                                            | 18 (17)                                   | 26.3 (25)                                    | 35.8 (34)                               | 58 (34)                                          | 24.2 (23)                                        | 13.7 (13)                                   | 36 (13)                                              | 76 (72)                                                |
| Rfa1           | 90                       | 1 (1)                                  | 27 (24)                             | 1 (1)                                      | 10 (9)                                  | 35.5 (32)                                          | 25.5 (23)                                 | 36 (33)                                      | 27 (24)                                 | 42 (24)                                          | 27 (24)                                          | 10 (9)                                      | 27 (9)                                               | 88 (79)                                                |
| Slx5           | 105                      | 3 (3)                                  | 44 (46)                             | 3 (3)                                      | 13 (14)                                 | 10 (11)                                            | 27 (28)                                   | 13 (14)                                      | 44 (46)                                 | 73 (46)                                          | 30 (31)                                          | 13 (14)                                     | 31 (14)                                              | 81 (85)                                                |
| Rad51          | 94                       | 5 (5)                                  | 25 (23)                             | 18 (17)                                    | 3 (3)                                   | 13 (12)                                            | 36 (34)                                   | 18 (17)                                      | 25 (23)                                 | 58 (23)                                          | 54 (51)                                          | 3 (3)                                       | 5.6 (3)**                                            | 73 (69)                                                |

For before relocation (\*\*) $p=0.002$  compared with Mre11-mCherry by Fisher's exact test. Comparisons were not done for after relocation data since it wasn't normalized to Mre11 occupancy.

**Supplementary Table 6: Timecourse of Rad51 co-localization with the CAG repeat. Related to Figure 6.**

| Time after alpha factor release | Total # of cells counted | A                             | B                          | C                                 | D                              | E                                         | F                                | G                                   | H                              | % (#) of CAG at NP with Rad51 (B/(G+B)) | I                                       | J                                  | % (#) of CAG NOT at NP with Rad51 (D/(I+D)) | K       |
|---------------------------------|--------------------------|-------------------------------|----------------------------|-----------------------------------|--------------------------------|-------------------------------------------|----------------------------------|-------------------------------------|--------------------------------|-----------------------------------------|-----------------------------------------|------------------------------------|---------------------------------------------|---------|
|                                 |                          | % (#) CAG at NP without Rad51 | % (#) CAG at NP with Rad51 | % (#) CAG NOT at NP without Rad51 | % (#) CAG NOT at NP with Rad51 | % (#) CAG and Rad51 at NP, but not co-loc | % (#) CAG NOT at NP, Rad51 at NP | % (#) CAG at NP without Rad51 (A+E) | % (#) CAG at NP with Rad51 (B) |                                         | % (#) CAG NOT at NP without Rad51 (C+F) | % (#) CAG NOT at NP with Rad51 (D) |                                             |         |
| S-phase cells                   | 94                       | 5 (5)                         | 25 (23)                    | 18 (17)                           | 3 (3)                          | 13 (12)                                   | 36 (34)                          | 18 (17)                             | 25 (23)                        | 58 (25)                                 | 54 (51)                                 | 3 (3)                              | 5.6 (3)                                     | 73 (69) |
| 50 min                          | 63                       | 2 (1)                         | 16 (10)                    | 9 (6)                             | 0 (0)                          | 25 (16)                                   | 48 (30)                          | 27 (17)                             | 15.9 (10)                      | 37 (10)                                 | 57.1 (36)                               | 0 (0)                              | 0 (0)                                       | 88 (56) |
| 60 min                          | 94                       | 5 (5)                         | 30 (28)                    | 7 (7)                             | 1 (1)                          | 27 (25)                                   | 30 (28)                          | 32 (30)                             | 29.8 (28)                      | 48 (28)                                 | 37 (35)                                 | 1 (1)                              | 2.7 (1)                                     | 86 (81) |
| 70 min                          | 95                       | 0 (0)                         | 8 (8)                      | 4 (4)                             | 0 (0)                          | 31 (29)                                   | 57 (54)                          | 30.5 (29)                           | 8.4 (8)                        | 22 (8)                                  | 61.1 (58)                               | 0 (0)                              | 0 (0)                                       | 97 (91) |
| 80 min                          | 96                       | 2 (2)                         | 9 (8)                      | 5 (5)                             | 4 (4)                          | 28 (27)                                   | 52 (50)                          | 30.2 (29)                           | 8.3 (8)                        | 22 (8)                                  | 57.3 (55)                               | 4.2 (4)                            | 6.8 (4)                                     | 89 (85) |

**Supplementary Table 7: Rad51 co-localization with the CAG repeat in mutant S-phase strains. Related to Figure 6.**

| Mutant strain              | Total # of cells counted | A                             | B                          | C                                 | D                              | E                                         | F                                | G                                   | H                              | % (#) of CAG at NP with Rad51 (B/(G+B)) | I                                       | J                                  | % (#) of CAG NOT at NP with Rad51 (D/(I+D)) | K        |
|----------------------------|--------------------------|-------------------------------|----------------------------|-----------------------------------|--------------------------------|-------------------------------------------|----------------------------------|-------------------------------------|--------------------------------|-----------------------------------------|-----------------------------------------|------------------------------------|---------------------------------------------|----------|
|                            |                          | % (#) CAG at NP without Rad51 | % (#) CAG at NP with Rad51 | % (#) CAG NOT at NP without Rad51 | % (#) CAG NOT at NP with Rad51 | % (#) CAG and Rad51 at NP, but not co-loc | % (#) CAG NOT at NP, Rad51 at NP | % (#) CAG at NP without Rad51 (A+E) | % (#) CAG at NP with Rad51 (B) |                                         | % (#) CAG NOT at NP without Rad51 (C+F) | % (#) CAG NOT at NP with Rad51 (D) |                                             |          |
| Wild-type                  | 94                       | 5 (5)                         | 25 (23)                    | 18 (17)                           | 3 (3)                          | 13 (12)                                   | 36 (34)                          | 18 (17)                             | 25 (23)                        | 58 (23)                                 | 54 (51)                                 | 3 (3)                              | 5.6 (3)                                     | 73 (69)  |
| <i>smt3-331</i>            | 54                       | 2 (1)                         | 28(15)                     | (0) 0                             | 7 (4)                          | 39 (21)                                   | 24 (13)                          | 41 (22)                             | 28 (15)                        | 41 (15)                                 | 24 (13)                                 | 7 (4)                              | 24 (4)*                                     | 91 (49)  |
| <i>rpa-6KR</i>             | 79                       | 1.3 (1)                       | 25.3 (20)                  | 1.3 (1)                           | 10.1 (8)                       | 24 (19)                                   | 38 (30)                          | 25.3 (20)                           | 25.3 (20)                      | 50 (20)                                 | 39 (31)                                 | 10.1 (8)                           | 26 (8)*                                     | 87 (69)  |
| <i>rfa1-4KR</i>            | 94                       | 2 (2)                         | 10 (9)                     | 5 (5)                             | 12 (11)                        | 17 (16)                                   | 54 (51)                          | 19 (18)                             | 9 (9)                          | 33 (9)                                  | 60 (56)                                 | 12 (11)                            | 16 (11)                                     | 81 (76)  |
| <i>rad52-3KR rad59-2KR</i> | 106                      | 3 (3)                         | 25 (27)                    | 2 (2)                             | 0 (0)                          | 16 (17)                                   | 54 (57)                          | 19 (20)                             | 25 (27)                        | 57 (27)                                 | 56 (59)                                 | 0 (0)                              | 0 (0)                                       | 95 (101) |
| <i>slx5Δ</i>               | 68                       | 3 (2)                         | 16 (11)                    | 3 (2)                             | 4 (3)                          | 34 (23)                                   | 40 (27)                          | 37 (25)                             | 16 (11)                        | 30 (11)*                                | 43 (29)                                 | 4 (3)                              | 10 (3)                                      | 90 (61)  |

(\* )p<0.05 compared with wild-type by Fisher's exact test. Exact p-values listed below in Table S8.

**Supplementary Table 8: p-values for Rad51 co-localization with CAG repeat in mutant S-phase strains. Related to Figure 6.**

| <b>Mutant strain</b>       | <b>p-value to WT (Fisher's exact) for % CAG NOT at NP with Rad51</b> | <b>p-value to WT (Fisher's exact) for % CAG at NP with Rad51</b> |
|----------------------------|----------------------------------------------------------------------|------------------------------------------------------------------|
| <i>smt3-331</i>            | 0.05                                                                 | 0.1733                                                           |
| <i>rpa-6KR</i>             | 0.046                                                                | 0.654                                                            |
| <i>rfa1-4KR</i>            | 0.087                                                                | 0.0805                                                           |
| <i>rad52-3KR rad59-2KR</i> | 0.106                                                                | 1.0                                                              |
| <i>slx5A</i>               | 0.6664                                                               | 0.0224                                                           |
